# Supplementary material
Source: HighWire-hosted journal article supplement (http://www.ajnr.org/highwire/filestream/52118/field_highwire_adjunct_files/0/A1039.pdf)
Supplement: A1039.pdf [file A1039.pdf]

**On-line Table 1: Volume of affected tissue (mL) in patients receiving thrombolysis**

| Patient | Age (yr) | Time from Ictus (min) | MTT  | CBF  | CBV  | FU-CT | Salvaged Tissue |
|---------|----------|-----------------------|------|------|------|-------|-----------------|
| 1       | 73       | 35                    | 15.0 | 12.5 | 6.1  | 0.0   | 15.0            |
| 2       | 70       | 35                    | 64.0 | 62.0 | 0.0  | 1.9   | 62.1            |
| 3       | 75       | 45                    | 41.7 | 38.1 | 0.0  | 0.7   | 41.0            |
| 4       | 79       | 45                    | 31.5 | 31.5 | 21.8 | 36.2  | 0.0             |
| 5       | 77       | 50                    | 64.1 | 69.1 | 42.7 | 24.8  | 39.3            |
| 6       | 41       | 55                    | 24.5 | 24.6 | 0.0  | 6.0   | 18.5            |
| 7       | 76       | 60                    | 19.9 | 19.9 | 0.0  | 0.0   | 19.9            |
| 8       | 67       | 60                    | 33.8 | 47.4 | 11.4 | 1.3   | 32.5            |
| 9       | 58       | 60                    | 53.3 | 51.6 | 27.4 | 58.1  | 0.0             |
| 10      | 53       | 60                    | 32.9 | 26.6 | 0.0  | 0.0   | 32.9            |
| 11      | 25       | 60                    | 19.6 | 16.1 | 0.0  | 0.0   | 19.6            |
| 12      | 76       | 60                    | 24.1 | 24.1 | 0.0  | 8.3   | 15.8            |
| 13      | 74       | 65                    | 62.4 | 64.0 | 0.0  | 60.6  | 1.8             |
| 14      | 64       | 70                    | 69.2 | 60.0 | 0.0  | 0.0   | 69.2            |
| 15      | 62       | 70                    | 10.0 | 9.7  | 0.0  | 0.0   | 10.0            |
| 16      | 68       | 70                    | 64.6 | 63.7 | 7.4  | 14.8  | 49.9            |
| 17      | 54       | 75                    | 25.3 | 25.3 | 3.3  | 12.9  | 12.4            |
| 18      | 79       | 75                    | 27.6 | 27.6 | 2.2  | 14.1  | 13.6            |
| 19      | 68       | 80                    | 33.8 | 35.3 | 0.6  | 2.2   | 31.6            |
| 20      | 69       | 80                    | 48.0 | 48.0 | 0.0  | 10.6  | 37.4            |
| 21      | 89       | 85                    | 7.3  | 7.8  | 2.8  | 9.6   | 0.0             |
| 22      | 70       | 85                    | 75.3 | 69.5 | 35.1 | 80.2  | 0.0             |
| 23      | 70       | 85                    | 24.7 | 22.4 | 2.6  | 11.5  | 13.2            |
| 24      | 71       | 90                    | 70.3 | 67.1 | 9.9  | 58.3  | 12.0            |
| 25      | 82       | 90                    | 44.1 | 44.1 | 13.8 | 20.5  | 23.6            |
| 26      | 77       | 100                   | 32.5 | 32.5 | 11.5 | 22.1  | 10.4            |
| 27      | 71       | 105                   | 60.1 | 60.1 | 0.0  | 7.7   | 52.4            |
| 28      | 65       | 105                   | 29.6 | 30.9 | 19.7 | 43.1  | 0.0             |
| 29      | 68       | 105                   | 42.9 | 35.0 | 5.1  | 7.1   | 35.7            |
| 30      | 66       | 105                   | 9.8  | 8.7  | 0.0  | 0.8   | 9.0             |
| 31      | 83       | 105                   | 46.8 | 45.4 | 1.2  | 6.0   | 40.8            |
| 32      | 66       | 105                   | 33.2 | 33.0 | 0.0  | 0.0   | 33.2            |
| 33      | 73       | 120                   | 44.2 | 50.2 | 0.6  | 11.5  | 32.8            |
| 34      | 58       | 120                   | 28.9 | 28.6 | 0.0  | 9.6   | 19.3            |
| 35      | 65       | 120                   | 27.2 | 27.2 | 0.0  | 1.2   | 26.0            |
| 36      | 67       | 120                   | 26.0 | 26.0 | 13.8 | 20.5  | 5.6             |
| 37      | 81       | 130                   | 22.6 | 21.5 | 0.0  | 3.1   | 19.5            |
| 38      | 65       | 135                   | 12.2 | 12.9 | 6.8  | 10.5  | 1.7             |
| 39      | 59       | 135                   | 5.1  | 5.1  | 1.2  | 5.1   | 0.0             |
| 40      | 68       | 140                   | 25.5 | 25.2 | 0.0  | 3.8   | 21.8            |
| 41      | 51       | 140                   | 18.0 | 17.2 | 0.0  | 0.0   | 18.0            |
| 42      | 76       | 145                   | 24.5 | 22.7 | 2.7  | 0.0   | 24.5            |
| 43      | 83       | 150                   | 13.7 | 10.6 | 0.0  | 0.0   | 13.7            |
| 44      | 76       | 175                   | 50.2 | 53.0 | 10.1 | 29.3  | 21.0            |
| Mean    | 68       | 91                    | 35.0 | 34.4 | 5.9  | 13.9  | 21.8            |
| SD      |          | 34                    | 18.8 | 18.7 | 9.9  | 19.2  | 17.1            |
| Median  | 70       | 85                    | 30.5 | 29.7 | 0.9  | 7.4   | 19.4            |

**Note:**—FU indicates follow-up; MTT, mean transit time; CBF, cerebral blood flow; CBV, cerebral blood volume.

**On-line Table 2: Volume of affected tissue (mL) in patients without thrombolysis**

| Patient | Age (yr) | Time from Ictus (min) | MTT  | CBF  | CBV  | FU-CT | Salvaged Tissue |
|---------|----------|-----------------------|------|------|------|-------|-----------------|
| 45      | 62       | 25                    | 6.1  | 6.1  | 0.0  | 0.0   | 6.1             |
| 46      | 79       | 30                    | 35.0 | 36.1 | 1.8  | 29.5  | 5.5             |
| 47      | 79       | 60                    | 53.7 | 56.1 | 39.7 | 54.6  | 0.0             |
| 48      | 66       | 60                    | 55.7 | 56.7 | 37.8 | 66.6  | 0.0             |
| 49      | 73       | 80                    | 18.2 | 16.8 | 0.0  | 0.0   | 18.2            |
| 50      | 67       | 80                    | 25.6 | 30.0 | 17.0 | 22.3  | 3.3             |
| 51      | 63       | 80                    | 32.0 | 32.0 | 24.1 | 29.8  | 2.2             |
| 52      | 76       | 85                    | 30.1 | 27.5 | 2.2  | 17.6  | 12.6            |
| 53      | 56       | 90                    | 70.2 | 70.2 | 34.1 | 47.1  | 23.2            |
| 54      | 75       | 95                    | 25.7 | 25.6 | 0.0  | 0.0   | 25.7            |
| 55      | 70       | 95                    | 45.3 | 45.3 | 0.0  | 2.9   | 42.4            |
| 56      | 57       | 105                   | 2.0  | 2.1  | 0.0  | 1.8   | 0.2             |
| 57      | 64       | 105                   | 8.0  | 6.4  | 0.0  | 0.0   | 8.0             |
| 58      | 89       | 120                   | 37.0 | 35.6 | 14.9 | 24.8  | 12.3            |
| 59      | 78       | 120                   | 26.5 | 13.2 | 0.0  | 0.0   | 26.5            |
| 60      | 65       | 120                   | 28.6 | 28.6 | 0.0  | 0.0   | 28.6            |
| 61      | 83       | 120                   | 35.0 | 35.0 | 22.3 | 36.3  | 0.0             |
| 62      | 78       | 135                   | 40.1 | 44.8 | 16.6 | 3.9   | 36.3            |
| 63      | 71       | 140                   | 16.5 | 13.9 | 4.6  | 16.3  | 0.2             |
| Mean    | 71       | 92                    | 31.1 | 30.6 | 11.3 | 18.6  | 13.2            |
| SD      |          | 32                    | 17.4 | 18.6 | 14.2 | 20.9  | 13.5            |
| Median  | 71       | 95                    | 30.1 | 30.0 | 2.2  | 16.3  | 8.0             |

**Note:**—FU indicates follow-up; MTT, mean transit time; CBF, cerebral blood flow; CBV, cerebral blood volume.
